# Supplementary material
Source: Springer Nature journal article supplement (https://www.springermedizin.de/resource/supplementary/12889_2012_5229_MOESM1_ESM.pdf/9494846)

# Youth Friendly Health Centres Compliance with Quality Standards

**% Compliance**

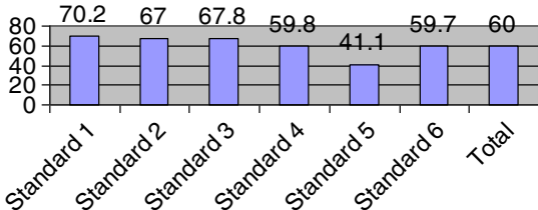

Supplement: MOESM1 [file 9494846]
